# Supplementary material for: CB4Se5: a planar tetracoordinate carbon CB4 core stabilized by peripheral Se/Se2 bridges
Source: Royal Society of Chemistry journal article supplement (doi:10.1039/d3cc05533g), 2024-01-01
Supplement: d3cc05533g1.pdf [file d3cc05533g1.pdf]

## SUPPLEMENTARY INFORMATION

### **CB<sub>4</sub>Se<sub>5</sub>: planar tetracoordinate carbon CB<sub>4</sub> core stabilized by the peripheral Se/Se<sub>2</sub> bridges**

Li-Xia Bai, Rui Sun, Yan-Bo Wu, and Jin-Chang Guo\*

<sup>1</sup>Nanocluster Laboratory, Institute of Molecular Science, Shanxi University, Taiyuan 030006, China.

E-mail: guojc@sxu.edu.cn

#### Table of Contents

- Table S1.** The lowest vibrational frequency at eight classical theoretical levels for the global-minimum structure **1** ( $C_{2v}$ ,  $^1A_1$ ) of CB<sub>4</sub>Se<sub>5</sub> cluster.
- Table S2.** Orbital composition analysis of canonical molecular orbitals (CMOs) of the global-minimum structure **1** ( $C_{2v}$ ,  $^1A_1$ ) of CB<sub>4</sub>Se<sub>5</sub> cluster.
- Figure S1.** Optimized structures of  $C_{4v}$  CB<sub>4</sub>X<sub>4</sub> (X = O, S, Se, Te) and  $C_{2v}$  CB<sub>4</sub>Po<sub>4</sub> at the PBE0-D3(BJ)/def2-TZVPP level. The lowest vibrational frequencies are shown.
- Figure S2.** Optimized structures of  $C_s$  CB<sub>4</sub>X<sub>5</sub> (X = O, S, Te, Po) and  $C_{2v}$  CB<sub>4</sub>Se<sub>5</sub> minima at the PBE0-D3(BJ)/def2-TZVPP level. The lowest vibrational frequencies are shown.
- Figure S3.** Alternative optimized low-lying isomeric structures of CB<sub>4</sub>Se<sub>5</sub> cluster at the PBE0-D3(BJ)/def2-TZVPP level. Relative energies are listed in kcal mol<sup>-1</sup> at the single-point CCSD(T)/def2-TZVPP//PBE0-D3(BJ)/def2-TZVPP level, with zero-point energy (ZPE) corrections at PBE0-D3(BJ).
- Figure S4.** Calculated root-mean-square deviations (RMSDs) of GM clusters of CB<sub>4</sub>Se<sub>5</sub> during the Born-Oppenheimer molecular dynamics (BOMD) simulations at 298, 600 and 1000 K.
- Figure S5.** Analysis of canonical molecular orbitals (CMOs) of  $C_{2v}$  CB<sub>4</sub>Se<sub>5</sub> (**1**) cluster. (a)

Five lone pairs (LPs) of Se atoms. (b) Nine CMOs, corresponding to eight localized two-center two-electron (2c-2e) B-Se bonds and one Se-Se bond. (c) Five CMOs, corresponding to two 2c-2e B-Se and three three-center two-electron (3c-2e) B-Se-B bonds. (d) One delocalized  $\pi$  CMO. (e) Three delocalized  $\sigma$  CMOs.

**Figure S6.** Plot of the Laplacian of electron density, bond paths and critical points for  $\text{CB}_4\text{Se}_5$  (**1**). The red dashed lines denote the areas of charge concentration ( $\nabla^2\rho(\mathbf{r}) < 0$ ) and the blue area is vice versa. The brown sticks between the atoms represent bond paths. The brown and yellow dots are bond and ring critical points, respectively.

**Figure S7.** Selected canonical molecular orbitals (CMOs) and energy level diagram of  $C_{2v}$   $\text{CB}_4\text{Se}_5$  (**1**) at PBE0/def2-TZVPP level.

**Figure S8.** Selected canonical molecular orbitals (CMOs) and energy level diagram of  $\text{CB}_4\text{Se}_5$  ( $C_s$ ,  $^3A'$ ) at PBE0/def2-TZVPP level.

**Figure S9.** Nucleus independent chemical shifts (NICSs) for cluster **1**. NICS (0) is calculated at the center of a triangle. NICS (1), shown in red, is calculated at 1 Å above the center of a triangle and above the C center.

**Figure S10.** Simulated IR spectrum of  $\text{CB}_4\text{Se}_5$  at the PBE0-D3/def2-TZVPP level.

**Figure S11.** Optimized structure of  $\text{CB}_4\text{Se}_5[\text{Al}(\text{CH}_3)_3]_5$  at the PBE0/def2-TZVP level.

Cartesian coordinates of optimized structures of top 20 low-lying isomers of  $\text{CB}_4\text{Se}_5$ .

**Table S1.** The lowest vibrational frequency at eight classical theoretical levels for the global-minimum structure **1** ( $C_{2v}$ ,  $^1A_1$ ) of  $CB_4Se_5$  cluster.

|   | Theoretical level           | Lowest vibrational frequency ( $cm^{-1}$ ) |
|---|-----------------------------|--------------------------------------------|
| 1 | PBE0-D3(BJ)/aug-cc-pvtz     | 13.6                                       |
| 2 | BP86-D3(BJ)/aug-cc-pvtz     | 12.8                                       |
| 3 | B3LYP-D3(BJ)/aug-cc-pvtz    | 16.4                                       |
| 4 | TPSS-D3(BJ)/aug-cc-pvtz     | 9.9                                        |
| 5 | $\omega$ B97X-D/aug-cc-pvtz | 21.9                                       |
| 6 | M062x/aug-cc-pvtz           | 12.5                                       |
| 7 | B2PLYP-D3(BJ)/aug-cc-pvtz   | 17.9                                       |
| 8 | MP2/aug-cc-pvtz             | 15.0                                       |

**Table S2.** Orbital composition analysis of canonical molecular orbitals (CMOs) of the global-minimum structure **1** ( $C_{2v}$ ,  $^1A_1$ ) of  $CB_4Se_5$  cluster.

| CMO                                                                                                 | C (%)              |              | B <sub>4</sub> (%) |              | Se <sub>5</sub> (%) |              |
|-----------------------------------------------------------------------------------------------------|--------------------|--------------|--------------------|--------------|---------------------|--------------|
|                                                                                                     | s/p                | total        | s/p                | total        | s/p                 | total        |
| <br>HOMO (a'')     | 0.00/0.00          | 0.00         | 0.00/9.69          | 9.69         | 0.00/89.69          | <b>89.69</b> |
| <br>HOMO-1 (a'')   | 0.00/ <b>29.17</b> | <b>29.17</b> | 0.00/0.00          | 0.00         | 0.00/ <b>69.76</b>  | <b>69.76</b> |
| <br>HOMO-2 (a'')  | 0.00/4.87          | 4.87         | 0.00/4.52          | 4.52         | 0.00/ <b>89.70</b>  | <b>89.70</b> |
| <br>HOMO-3 (a')  | 0.00/5.26          | 5.26         | 0.00/ <b>16.10</b> | <b>16.10</b> | 0.00/ <b>75.86</b>  | <b>75.86</b> |
| <br>HOMO-4 (a')  | 0.00/ <b>20.03</b> | <b>20.03</b> | 0.00/9.38          | 9.38         | 0.95/ <b>65.51</b>  | <b>66.46</b> |
| <br>HOMO-5 (a'') | 0.00/0.00          | 0.00         | 0.00/ <b>34.84</b> | <b>34.84</b> | 0.00/ <b>64.55</b>  | <b>64.55</b> |

| CMO                                                                                                  | C (%)              |              | B <sub>4</sub> (%)  |              | Se <sub>5</sub> (%) |              |
|------------------------------------------------------------------------------------------------------|--------------------|--------------|---------------------|--------------|---------------------|--------------|
|                                                                                                      | s/p                | total        | s/p                 | total        | s/p                 | total        |
| <br>HOMO-6 (a')     | 0.00/12.10         | 12.10        | 0.00/ <b>20.69</b>  | <b>20.69</b> | 4.22/ <b>61.10</b>  | <b>65.32</b> |
| <br>HOMO-7 (a'')    | 0.00/0.00          | 0.00         | 0.00/ <b>18.42</b>  | <b>18.42</b> | 0.00/ <b>80.55</b>  | <b>80.55</b> |
| <br>HOMO-8 (a')     | 1.96/0.00          | 1.96         | 1.48/6.77           | 8.25         | 4.13/ <b>83.31</b>  | <b>87.44</b> |
| <br>HOMO-9 (a')   | 0.00/1.87          | 1.87         | 12.67/ <b>19.96</b> | <b>32.63</b> | 8.38/ <b>54.80</b>  | <b>63.18</b> |
| <br>HOMO-10 (a')  | 3.28/1.55          | 4.83         | 10.82/13.25         | <b>24.07</b> | 10.94/ <b>57.90</b> | <b>68.84</b> |
| <br>HOMO-11 (a')  | 0.00/3.74          | 3.74         | 1.19/ <b>20.03</b>  | <b>21.22</b> | <b>17.41/55.22</b>  | <b>72.63</b> |
| <br>HOMO-12 (a'') | 0.00/ <b>31.87</b> | <b>31.87</b> | 0.00/ <b>46.28</b>  | <b>46.28</b> | 0.00/ <b>20.91</b>  | <b>20.91</b> |

| CMO                                                                                                 | C (%)              |              | B <sub>4</sub> (%) |              | Se <sub>5</sub> (%) |              |
|-----------------------------------------------------------------------------------------------------|--------------------|--------------|--------------------|--------------|---------------------|--------------|
|                                                                                                     | s/p                | total        | s/p                | total        | s/p                 | total        |
| <br>HOMO-13 (a')   | 1.56/2.09          | 3.65         | 8.99/ <b>24.29</b> | <b>33.28</b> | 2.74/ <b>58.49</b>  | <b>61.23</b> |
| <br>HOMO-14 (a')   | 0.00/0.00          | 0.00         | <b>29.00/17.70</b> | <b>46.70</b> | 4.83/ <b>46.73</b>  | <b>51.56</b> |
| <br>HOMO-15 (a')  | 1.19/ <b>37.95</b> | <b>39.14</b> | 13.38/6.81         | <b>20.19</b> | <b>20.09/16.04</b>  | <b>36.13</b> |
| <br>HOMO-16 (a') | 0.00/ <b>42.76</b> | <b>42.76</b> | 5.18/12.94         | <b>18.12</b> | <b>27.32/8.05</b>   | <b>35.37</b> |
| <br>HOMO-17 (a') | 0.00/0.00          | 0.00         | 6.76/13.99         | <b>20.75</b> | <b>68.66/5.14</b>   | <b>73.80</b> |
| <br>HOMO-18 (a') | <b>15.60/0.00</b>  | <b>15.60</b> | 0.00/ <b>25.89</b> | <b>25.89</b> | <b>52.92/0.00</b>   | <b>52.92</b> |
| <br>HOMO-19 (a') | 2.05/0.00          | 2.05         | 1.45/ <b>32.06</b> | <b>33.51</b> | <b>55.45/0.99</b>   | <b>56.44</b> |

| CMO                                                                                               | C (%)             |              | B <sub>4</sub> (%) |              | Se <sub>5</sub> (%) |              |
|---------------------------------------------------------------------------------------------------|-------------------|--------------|--------------------|--------------|---------------------|--------------|
|                                                                                                   | s/p               | total        | s/p                | total        | s/p                 | total        |
| <br>HOMO-20 (a') | 0.00/10.58        | 10.58        | <b>15.62/18.22</b> | <b>33.84</b> | <b>46.68/3.12</b>   | <b>49.80</b> |
| <br>HOMO-21 (a') | 0.00/4.66         | 4.66         | 7.24/13.48         | <b>20.72</b> | <b>63.60/5.13</b>   | <b>68.73</b> |
| <br>HOMO-22 (a') | <b>25.58/1.36</b> | <b>26.94</b> | <b>33.21/11.20</b> | <b>44.41</b> | <b>18.50/3.95</b>   | <b>22.45</b> |

**Figure S1.** Optimized structures of  $C_{4v}$   $CB_4X_4$  ( $X = O, S, Se, Te$ ) and  $C_{2v}$   $CB_4Po_4$  at the PBE0-D3(BJ)/def2-TZVPP level. The lowest vibrational frequencies are shown.

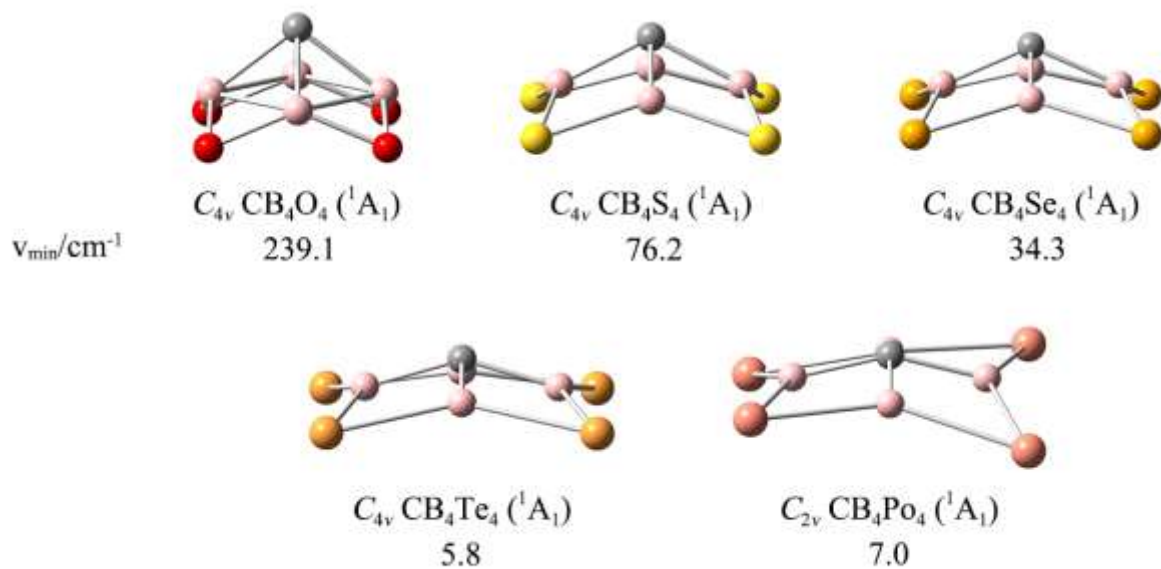



**Figure S2.** Optimized structures of  $C_s$   $CB_4X_5$  ( $X = O, S, Te, Po$ ) and  $C_{2v}$   $CB_4Se_5$  minima at the PBE0-D3(BJ)/def2-TZVPP level. The lowest vibrational frequencies are shown.

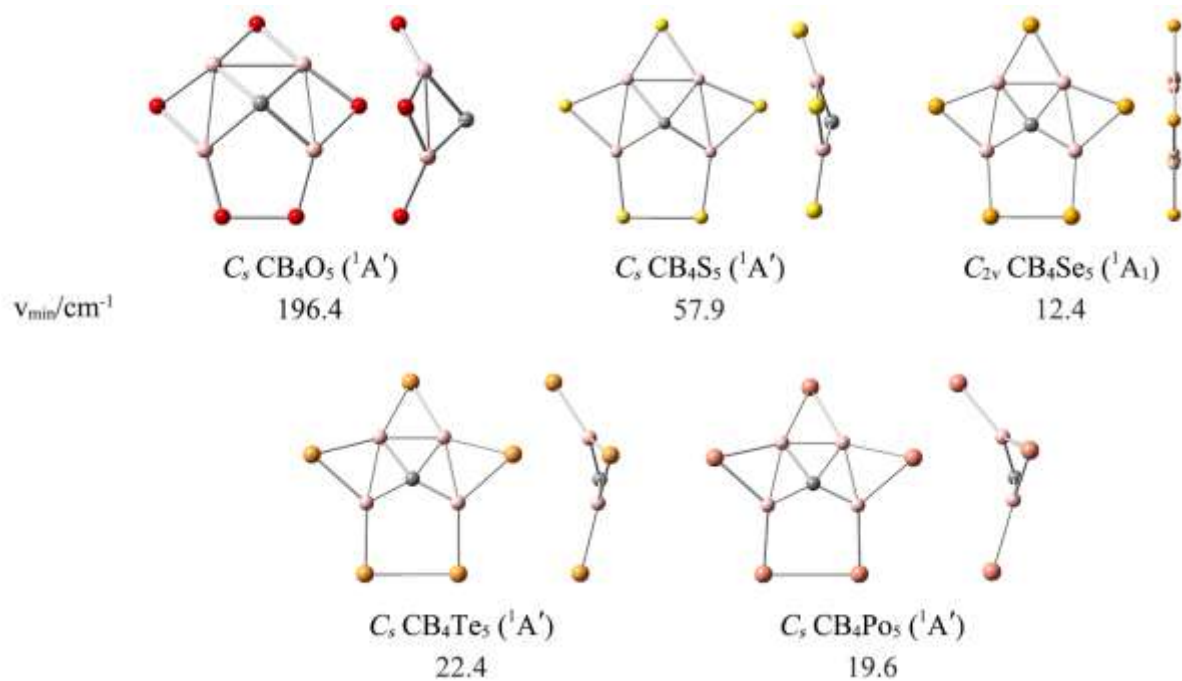

**Figure S3.** Alternative optimized low-lying isomeric structures of  $\text{CB}_4\text{Se}_5$  cluster at the PBE0-D3(BJ)/def2-TZVPP level. Relative energies are listed in  $\text{kcal mol}^{-1}$  at the single-point CCSD(T)/def2-TZVPP//PBE0-D3(BJ)/def2-TZVPP level, with zero-point energy (ZPE) corrections at PBE0-D3(BJ).

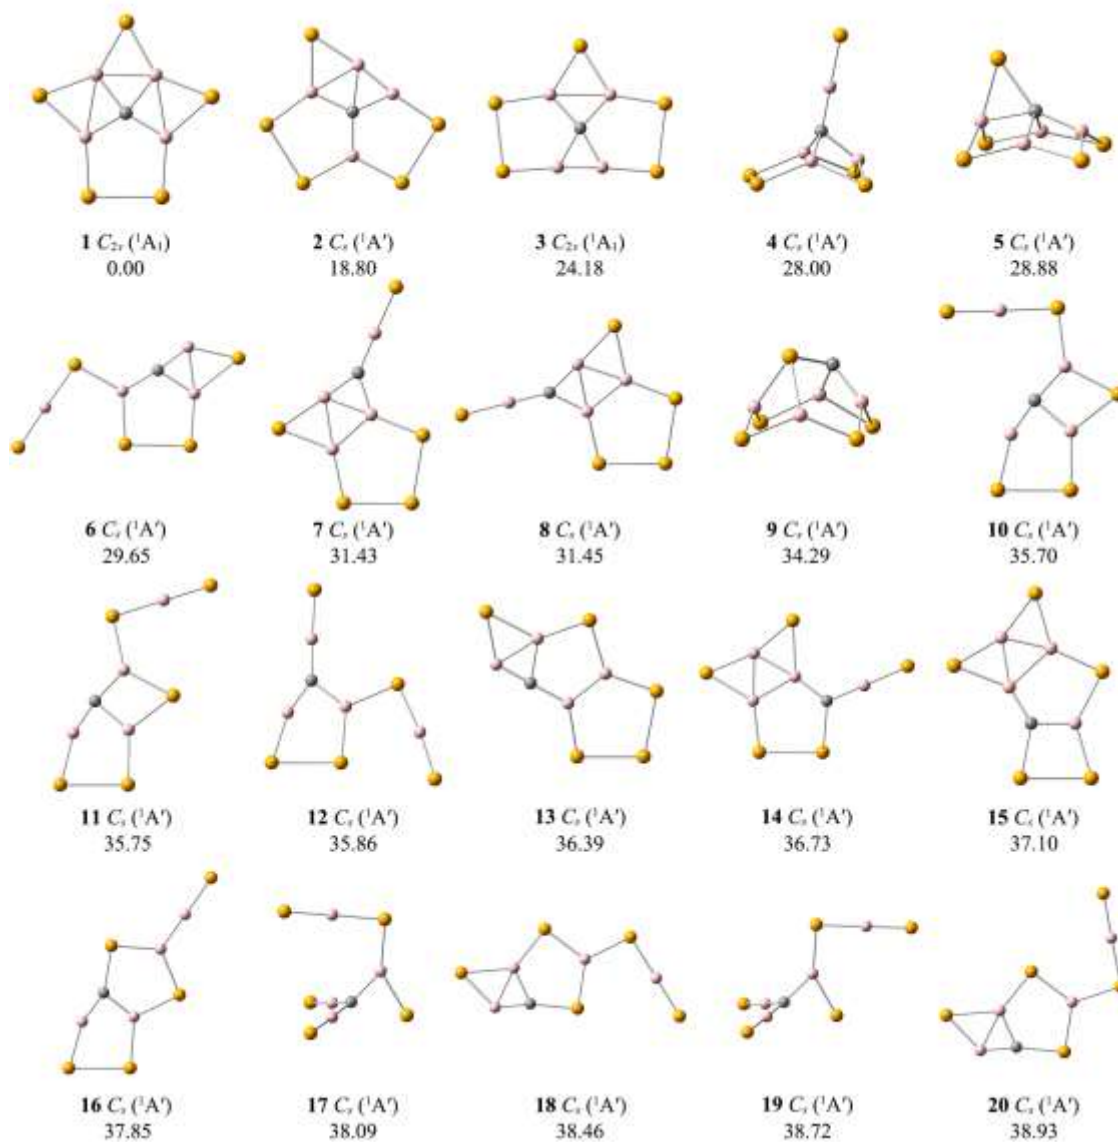

**Figure S4.** Calculated root-mean-square deviations (RMSDs) of GM clusters of  $\text{CB}_4\text{Se}_5$  during the Born-Oppenheimer molecular dynamics (BOMD) simulations at 298, 600 and 1000 K.

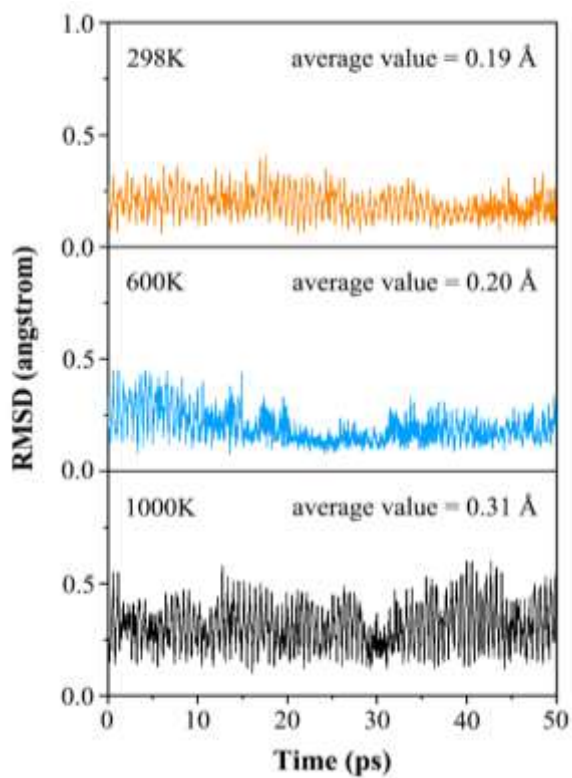

**Figure S5.** Analysis of canonical molecular orbitals (CMOs) of  $C_{2v}$   $CB_4Se_5$  (**1**) cluster. (a) Five lone pairs (LPs) of Se atoms. (b) Nine CMOs, corresponding to eight localized two-center two-electron (2c-2e) B-Se bonds and one Se-Se bond. (c) Five CMOs, corresponding to two 2c-2e B-Se and three three-center two-electron (3c-2e) B-Se-B bonds. (d) One delocalized  $\pi$  CMO. (e) Three delocalized  $\sigma$  CMOs.

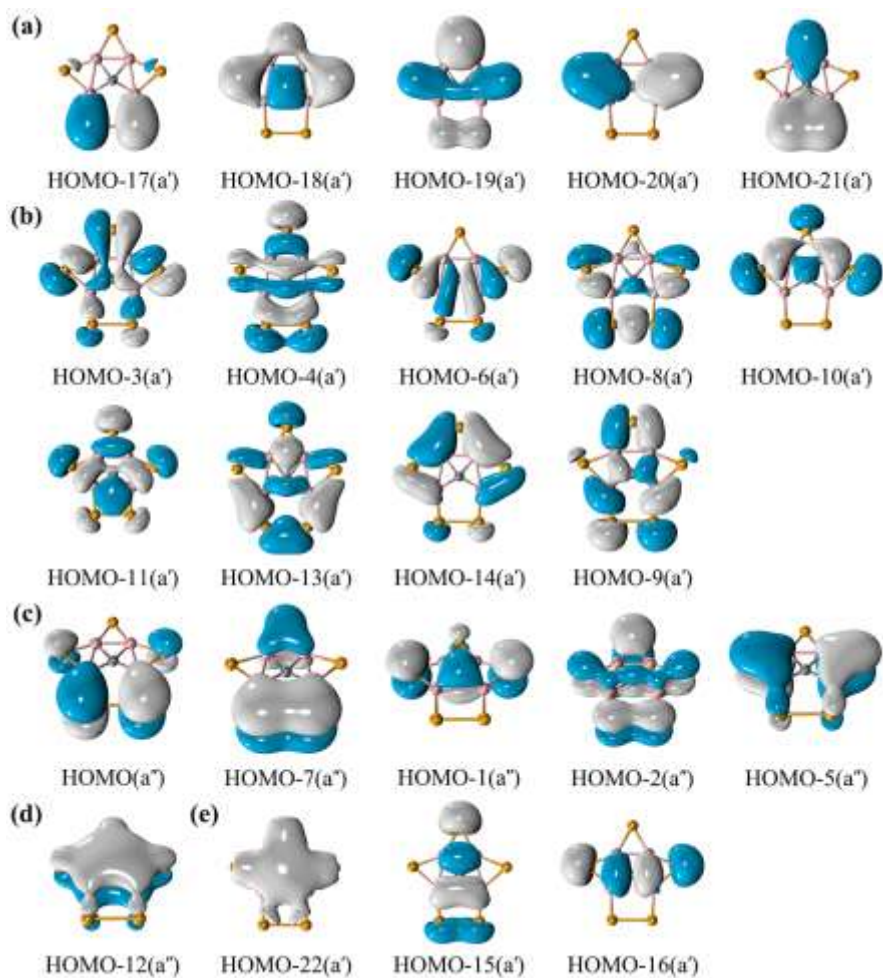

**Figure S6.** Plot of the Laplacian of electron density, bond paths and critical points for  $\text{CB}_4\text{Se}_5$  (**1**). The red dashed lines denote the areas of charge concentration ( $\nabla^2\rho(\mathbf{r}) < 0$ ) and the blue area is vice versa. The brown sticks between the atoms represent bond paths. The brown and yellow dots are bond and ring critical points, respectively.

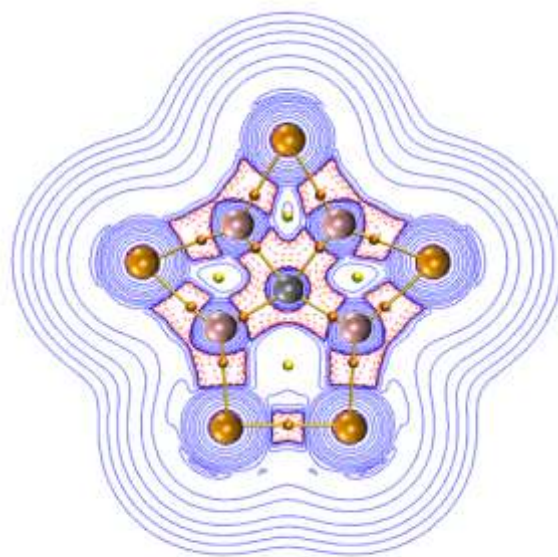

**1**  $\text{CB}_4\text{Se}_5$

**Figure S7.** Selected canonical molecular orbitals (CMOs) and energy level diagram of  $C_{2v}$   $CB_4Se_5$  (**1**) at PBE0/def2-TZVPP level.

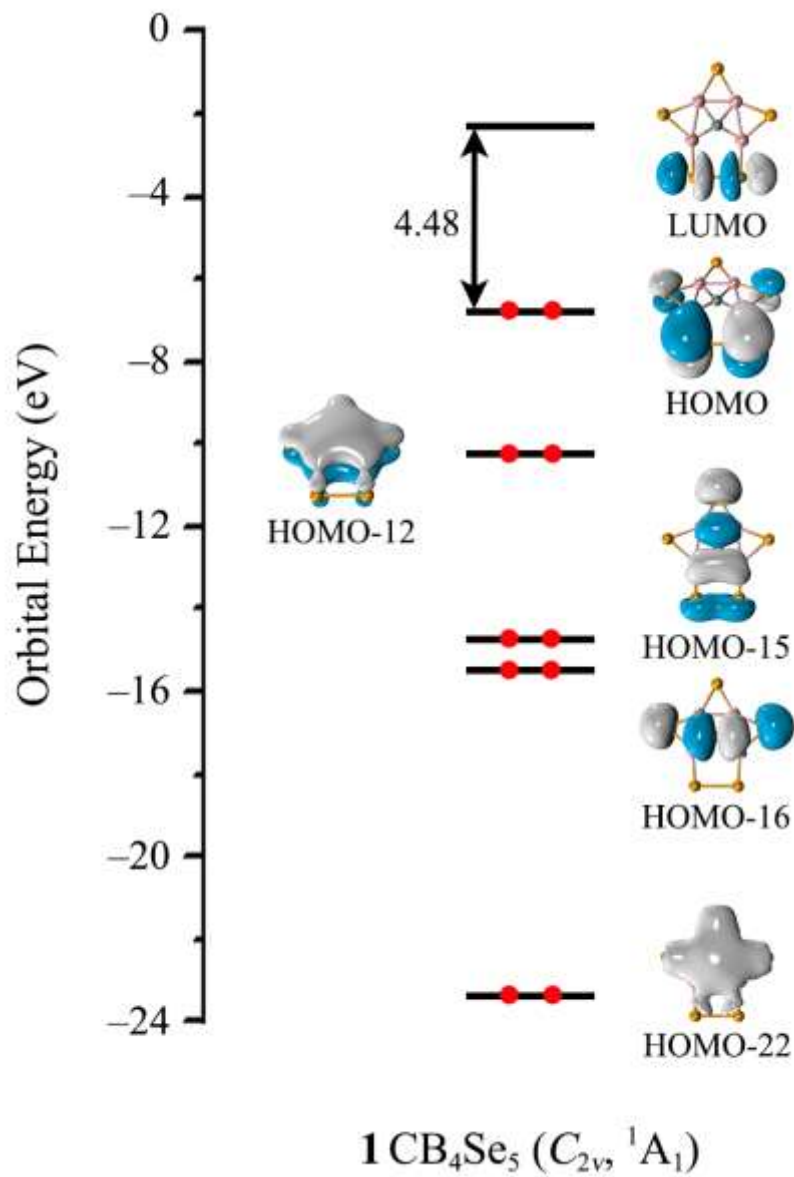

**Figure S8.** Selected canonical molecular orbitals (CMOs) and energy level diagram of  $\text{CB}_4\text{Se}_5$  ( $C_s, {}^3A'$ ) at PBE0/def2-TZVPP level.

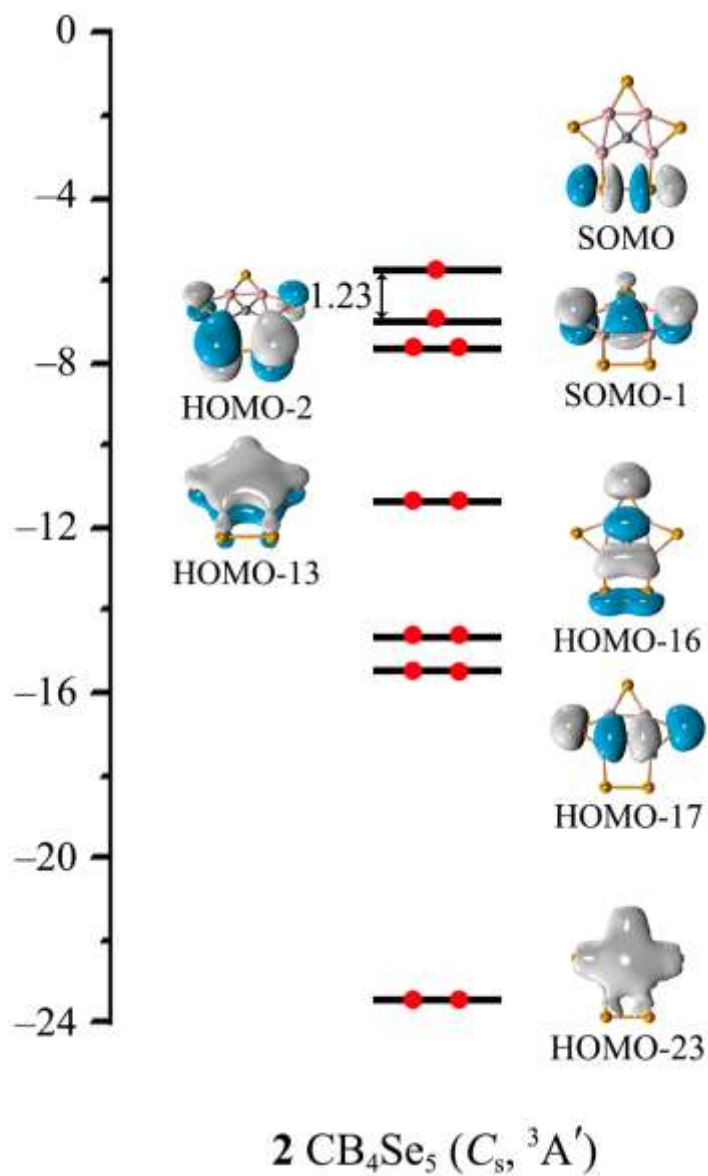

**Figure S9.** Nucleus independent chemical shifts (NICs) for cluster **1**. NICS(0) is calculated at the center of a triangle. NICS(1), shown in red, is calculated at 1 Å above the center of a triangle and above the C center.

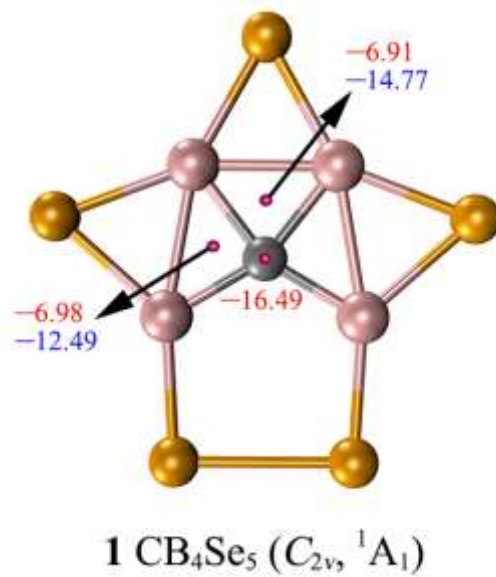



**Figure S10.** Simulated IR spectrum of  $\text{CB}_4\text{Se}_5$  at the PBE0-D3/def2-TZVPP level.

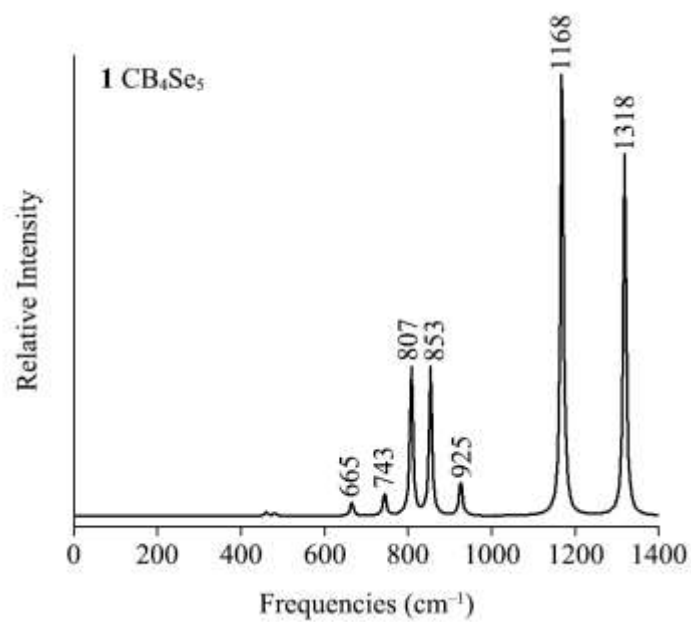

**Figure S11.** Optimized structure of  $\text{CB}_4\text{Se}_5[\text{Al}(\text{CH}_3)_3]_5$  at the PBE0/def2-TZVP level.

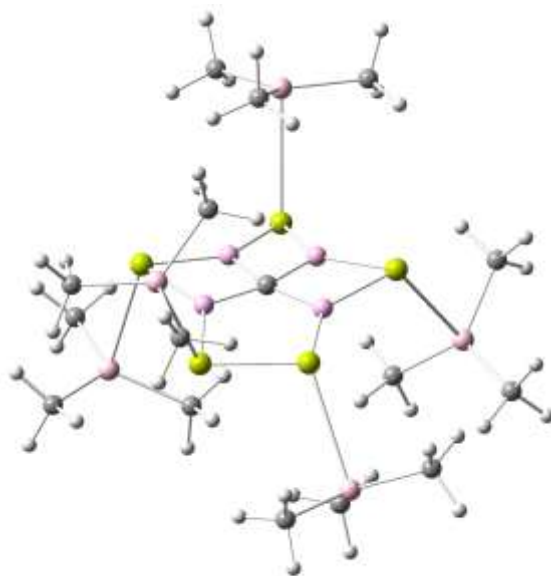

$\text{CB}_4\text{Se}_5[\text{Al}(\text{CH}_3)_3]_5$  ( $C_1$ ,  $^1A$ )

Cartesian coordinates of optimized structures of top 20 low-lying isomers of CB<sub>4</sub>Se<sub>5</sub>.

**1**

|    |             |             |            |
|----|-------------|-------------|------------|
| C  | 0.00000000  | 0.21323398  | 0.00000000 |
| B  | 0.96027659  | 1.44960773  | 0.00000000 |
| B  | -0.96027659 | 1.44960773  | 0.00000000 |
| B  | 1.29812700  | -0.55512315 | 0.00000000 |
| B  | -1.29812700 | -0.55512315 | 0.00000000 |
| Se | 1.18482413  | -2.48078017 | 0.00000000 |
| Se | -1.18482413 | -2.48078017 | 0.00000000 |
| Se | 0.00000000  | 3.14502715  | 0.00000000 |
| Se | 2.78181115  | 0.75433982  | 0.00000000 |
| Se | -2.78181115 | 0.75433982  | 0.00000000 |

**2**

|    |             |             |            |
|----|-------------|-------------|------------|
| C  | -0.01065924 | 0.56416727  | 0.00000000 |
| B  | -0.54532680 | 2.09901598  | 0.00000000 |
| B  | 0.95771313  | 1.73710367  | 0.00000000 |
| B  | -1.56899236 | 0.53897199  | 0.00000000 |
| B  | 0.66179840  | -0.80660423 | 0.00000000 |
| Se | -2.45226255 | -1.15115407 | 0.00000000 |
| Se | -2.44137511 | 2.32399471  | 0.00000000 |
| Se | 2.82137586  | 1.48315799  | 0.00000000 |
| Se | -0.44531365 | -2.40234895 | 0.00000000 |
| Se | 2.59222231  | -0.87798618 | 0.00000000 |

**3**

|    |             |             |            |
|----|-------------|-------------|------------|
| C  | 0.00000000  | -0.25459103 | 0.00000000 |
| B  | 0.76534400  | -1.60287303 | 0.00000000 |
| B  | -1.03306500 | 0.89378597  | 0.00000000 |
| B  | -0.76534400 | -1.60287303 | 0.00000000 |
| B  | 1.03306500  | 0.89378597  | 0.00000000 |
| Se | 2.92786000  | 0.59674397  | 0.00000000 |
| Se | -2.92786000 | 0.59674397  | 0.00000000 |
| Se | 0.00000000  | 2.57073097  | 0.00000000 |
| Se | -2.65589600 | -1.75536803 | 0.00000000 |
| Se | 2.65589600  | -1.75536803 | 0.00000000 |

**4**

|   |             |            |            |
|---|-------------|------------|------------|
| C | -0.11411088 | 0.61302325 | 0.00000000 |
| B | -0.59731682 | 2.01688570 | 0.00000000 |

|    |             |             |             |
|----|-------------|-------------|-------------|
| B  | 1.43585487  | 0.39337214  | 0.00000000  |
| B  | -0.07082189 | -0.34164025 | 1.22768900  |
| B  | -0.07082189 | -0.34164025 | -1.22768900 |
| Se | 1.79264970  | -0.12184789 | -1.86102200 |
| Se | -1.15216906 | 3.66781082  | 0.00000000  |
| Se | -1.25773879 | -1.89313143 | -1.20722900 |
| Se | 1.79264970  | -0.12184789 | 1.86102200  |
| Se | -1.25773879 | -1.89313143 | 1.20722900  |

## 5

|    |             |             |             |
|----|-------------|-------------|-------------|
| C  | 0.69593361  | 0.07404951  | 0.00000000  |
| B  | -0.10960321 | 0.19246698  | 1.40100700  |
| B  | 0.48057335  | 1.61261587  | 0.00000000  |
| B  | -0.04810270 | -1.47223194 | 0.00000000  |
| B  | -0.10960321 | 0.19246698  | -1.40100700 |
| Se | -1.00228378 | -1.43512184 | 1.80679500  |
| Se | -0.05196778 | 2.10261908  | -1.82374300 |
| Se | -1.00228378 | -1.43512184 | -1.80679500 |
| Se | -0.05196778 | 2.10261908  | 1.82374300  |
| Se | 1.95432890  | -1.42531468 | 0.00000000  |

## 6

|    |             |             |            |
|----|-------------|-------------|------------|
| C  | -1.26301923 | 1.10378829  | 0.00000000 |
| B  | 3.03022758  | 0.75692421  | 0.00000000 |
| B  | 0.16225408  | 0.67351041  | 0.00000000 |
| B  | -2.34956762 | -0.03088154 | 0.00000000 |
| B  | -2.52677286 | 1.66872531  | 0.00000000 |
| Se | 0.52461557  | -1.23036185 | 0.00000000 |
| Se | 1.61733926  | 2.00727038  | 0.00000000 |
| Se | 4.31042001  | -0.42350180 | 0.00000000 |
| Se | -1.77245295 | -1.83851394 | 0.00000000 |
| Se | -4.20940985 | 0.83910363  | 0.00000000 |

## 7

|    |             |             |            |
|----|-------------|-------------|------------|
| C  | 0.54641658  | 1.77363656  | 0.00000000 |
| B  | -0.05999515 | 0.40635496  | 0.00000000 |
| B  | 0.11942247  | 3.17527764  | 0.00000000 |
| B  | 1.60939378  | 0.82899126  | 0.00000000 |
| B  | 1.13677516  | -0.90806822 | 0.00000000 |
| Se | 0.55576292  | -2.69615374 | 0.00000000 |
| Se | 3.04542287  | -0.41108477 | 0.00000000 |

|    |             |             |            |
|----|-------------|-------------|------------|
| Se | -1.77674555 | -2.44924319 | 0.00000000 |
| Se | -1.90586814 | -0.10340774 | 0.00000000 |
| Se | -0.42758624 | 4.83181305  | 0.00000000 |

## 8

|    |             |             |            |
|----|-------------|-------------|------------|
| C  | 1.77515795  | 0.53560624  | 0.00000000 |
| B  | 0.83473590  | 1.60261520  | 0.00000000 |
| B  | -0.90399608 | 1.13677612  | 0.00000000 |
| B  | 3.17706996  | 0.10937130  | 0.00000000 |
| B  | 0.40561397  | -0.06495482 | 0.00000000 |
| Se | 4.83531699  | -0.43233562 | 0.00000000 |
| Se | -2.45798395 | -1.76976095 | 0.00000000 |
| Se | -0.11264994 | -1.90880085 | 0.00000000 |
| Se | -0.39971417 | 3.04345314  | 0.00000000 |
| Se | -2.69491206 | 0.56354204  | 0.00000000 |

## 9

|    |             |             |             |
|----|-------------|-------------|-------------|
| C  | -1.57021164 | 0.94464663  | 0.00000000  |
| B  | -0.04530590 | -1.25251610 | 1.02617900  |
| B  | -0.04530590 | -1.25251610 | -1.02617900 |
| B  | -0.52444345 | 1.44417979  | -0.93945900 |
| B  | -0.52444345 | 1.44417979  | 0.93945900  |
| Se | 0.86660997  | -2.66165209 | 0.00000000  |
| Se | 0.29768933  | 2.98021487  | 0.00000000  |
| Se | 0.52110913  | 0.20433676  | -2.13963300 |
| Se | -1.76184806 | -0.95031032 | 0.00000000  |
| Se | 0.52110913  | 0.20433676  | 2.13963300  |

## 10

|    |             |             |            |
|----|-------------|-------------|------------|
| C  | -0.05740737 | 0.13293629  | 0.00000000 |
| B  | 3.11686302  | 0.34992799  | 0.00000000 |
| B  | 0.71570114  | -1.14976184 | 0.00000000 |
| B  | -0.89624973 | 1.20812329  | 0.00000000 |
| B  | -1.37792678 | -0.71066959 | 0.00000000 |
| Se | 2.64058203  | -1.48351559 | 0.00000000 |
| Se | -0.67052730 | -2.56240774 | 0.00000000 |
| Se | -2.53069936 | 2.16514715  | 0.00000000 |
| Se | 3.58262029  | 2.02522823  | 0.00000000 |
| Se | -3.24101960 | -0.12344373 | 0.00000000 |

## 11

|    |             |             |            |
|----|-------------|-------------|------------|
| C  | 0.88378690  | 1.10570220  | 0.00000000 |
| B  | -3.40433612 | 0.52997736  | 0.00000000 |
| B  | 1.27364484  | -0.41633882 | 0.00000000 |
| B  | 2.23422791  | 1.29389914  | 0.00000000 |
| B  | -0.55903912 | 0.68423025  | 0.00000000 |
| Se | 4.08442889  | 0.88442607  | 0.00000000 |
| Se | 3.03217181  | -1.26832589 | 0.00000000 |
| Se | -0.50750119 | -1.28600975 | 0.00000000 |
| Se | -2.09454007 | 1.89552331  | 0.00000000 |
| Se | -4.60353617 | -0.72835059 | 0.00000000 |

## 12

|    |             |             |            |
|----|-------------|-------------|------------|
| C  | 0.69386613  | 1.62167804  | 0.00000000 |
| B  | 1.94139228  | 0.98057848  | 0.00000000 |
| B  | -1.90117565 | -1.72267721 | 0.00000000 |
| B  | 0.03489965  | 2.93802736  | 0.00000000 |
| B  | 0.02581803  | 0.26320574  | 0.00000000 |
| Se | -0.82308877 | 4.45474772  | 0.00000000 |
| Se | -1.63889876 | -3.45070313 | 0.00000000 |
| Se | 1.05318428  | -1.45119690 | 0.00000000 |
| Se | 3.22976822  | -0.35264082 | 0.00000000 |
| Se | -1.95825521 | 0.15197725  | 0.00000000 |

## 13

|    |             |             |            |
|----|-------------|-------------|------------|
| C  | 1.40108848  | -1.28978123 | 0.00000000 |
| B  | -0.21933368 | 0.80567759  | 0.00000000 |
| B  | -0.03195248 | -0.85661972 | 0.00000000 |
| B  | 2.72655447  | -1.66845567 | 0.00000000 |
| B  | 2.34681461  | -0.00556123 | 0.00000000 |
| Se | -3.24653014 | -0.31141929 | 0.00000000 |
| Se | 1.51478133  | 1.74019159  | 0.00000000 |
| Se | -1.58903180 | -1.96538685 | 0.00000000 |
| Se | 4.28822352  | -0.61172833 | 0.00000000 |
| Se | -1.92382366 | 1.62962179  | 0.00000000 |

## 14

|   |             |             |            |
|---|-------------|-------------|------------|
| C | -0.99957142 | -0.47463138 | 0.00000000 |
| B | 1.67564441  | -0.10551888 | 0.00000000 |
| B | 0.03187820  | 0.55694744  | 0.00000000 |
| B | 1.41258081  | 1.59819146  | 0.00000000 |
| B | -2.43132044 | -0.09958515 | 0.00000000 |

|    |             |             |            |
|----|-------------|-------------|------------|
| Se | -4.10946436 | 0.38948430  | 0.00000000 |
| Se | -0.15969912 | 2.58476139  | 0.00000000 |
| Se | 1.70616808  | -1.99232822 | 0.00000000 |
| Se | -0.59666220 | -2.30139809 | 0.00000000 |
| Se | 3.23476094  | 1.11646926  | 0.00000000 |

### 15

|    |             |             |            |
|----|-------------|-------------|------------|
| C  | 0.57962247  | 0.79273854  | 0.00000000 |
| B  | 0.88308873  | -0.60721516 | 0.00000000 |
| B  | -0.83920023 | 1.27033454  | 0.00000000 |
| B  | 0.59594476  | -2.29241556 | 0.00000000 |
| B  | -0.88277301 | -1.40165254 | 0.00000000 |
| Se | -2.28034625 | -0.09720970 | 0.00000000 |
| Se | -0.75726539 | 3.20583316  | 0.00000000 |
| Se | 1.52187614  | 2.44288131  | 0.00000000 |
| Se | 2.42388132  | -1.89822033 | 0.00000000 |
| Se | -0.97470570 | -3.34745173 | 0.00000000 |

### 16

|    |             |             |            |
|----|-------------|-------------|------------|
| C  | 1.11280726  | 0.81820067  | 0.00000000 |
| B  | 1.25033213  | 2.19691408  | 0.00000000 |
| B  | 0.09451875  | -1.76667862 | 0.00000000 |
| B  | -0.02799371 | -3.40468160 | 0.00000000 |
| B  | -0.38235034 | 1.01921487  | 0.00000000 |
| Se | 0.75974851  | 4.01255312  | 0.00000000 |
| Se | -1.45906134 | -0.61714204 | 0.00000000 |
| Se | 1.80795322  | -0.90394604 | 0.00000000 |
| Se | -1.28962467 | 2.78881827  | 0.00000000 |
| Se | -0.15282094 | -5.13713766 | 0.00000000 |

### 17

|    |             |             |             |
|----|-------------|-------------|-------------|
| C  | -0.99368426 | -0.01385174 | 0.00000000  |
| B  | -0.97747080 | -0.76344626 | 1.30934200  |
| B  | -0.97747080 | -0.76344626 | -1.30934200 |
| B  | 2.21300094  | 0.67521592  | 0.00000000  |
| B  | -0.40149968 | 1.42306122  | 0.00000000  |
| Se | -0.91865461 | -1.59166847 | -2.83231000 |
| Se | 1.27564926  | 2.33536051  | 0.00000000  |
| Se | -2.26700884 | 1.62119162  | 0.00000000  |
| Se | -0.91865461 | -1.59166847 | 2.83231000  |
| Se | 3.02511901  | -0.85479790 | 0.00000000  |

**18**

|    |             |             |            |
|----|-------------|-------------|------------|
| C  | -1.58575930 | -1.38081128 | 0.00000000 |
| B  | -2.92462946 | -1.70680814 | 0.00000000 |
| B  | -2.41044307 | -0.08744901 | 0.00000000 |
| B  | 3.13150495  | 0.28110995  | 0.00000000 |
| B  | 0.28346367  | 0.62744517  | 0.00000000 |
| Se | 4.23860469  | -1.05916169 | 0.00000000 |
| Se | 0.26280725  | -1.30292135 | 0.00000000 |
| Se | -4.42202128 | -0.55811145 | 0.00000000 |
| Se | -1.43057159 | 1.56886572  | 0.00000000 |
| Se | 1.91338904  | 1.72525165  | 0.00000000 |

**19**

|    |             |             |             |
|----|-------------|-------------|-------------|
| C  | -0.14590355 | -1.25125968 | 0.00000000  |
| B  | -0.02992976 | -1.99422798 | 1.30748900  |
| B  | -0.02992976 | -1.99422798 | -1.30748900 |
| B  | 0.18076097  | 0.26969354  | 0.00000000  |
| B  | 0.61368278  | 2.98216856  | 0.00000000  |
| Se | 1.70533380  | 1.42153606  | 0.00000000  |
| Se | -1.68715278 | 0.14495029  | 0.00000000  |
| Se | 0.14300421  | -2.81781374 | -2.82493800 |
| Se | 0.14300421  | -2.81781374 | 2.82493800  |
| Se | -0.38646885 | 4.39827430  | 0.00000000  |

**20**

|    |             |             |            |
|----|-------------|-------------|------------|
| C  | -2.43059798 | -1.07245220 | 0.00000000 |
| B  | 2.99199094  | 0.15833133  | 0.00000000 |
| B  | -2.10516736 | 0.42726622  | 0.00000000 |
| B  | 0.31761716  | -0.94056755 | 0.00000000 |
| B  | -3.61162500 | -0.36286378 | 0.00000000 |
| Se | -0.24365498 | 0.92724969  | 0.00000000 |
| Se | 3.76301418  | 1.71600429  | 0.00000000 |
| Se | 2.18518766  | -1.55060131 | 0.00000000 |
| Se | -3.86578641 | 1.50594434  | 0.00000000 |
| Se | -1.05583370 | -2.30377694 | 0.00000000 |
